# Supplementary material for: Combined Anticoagulation and Antiaggregation in Acute Cervical Artery Dissection
Source: MDPI journal article supplement (doi:10.3390/jcm10194580), 2021-10-02
Supplement: s1 [file s1]

**Table S1.** Main results Odds ratio for the occurrence of initial recanalization. Odds Ratio OR, Confidence Interval CI.

| Characteristic  | OR   | 95% CI     | p-value |
|-----------------|------|------------|---------|
| Grouping        |      |            |         |
| <i>Group I</i>  | —    | —          |         |
| <i>Group II</i> | 3.61 | 1.14, 12.3 | 0.033   |

**Table S2.** Main results Odds ratio for the occurrence of functional recanalization. Odds Ratio OR, Confidence Interval CI.

| Characteristic                                         | OR   | 95% CI     | p-value |
|--------------------------------------------------------|------|------------|---------|
| Grouping                                               |      |            |         |
| <i>Group I</i>                                         | —    | —          |         |
| <i>Group II</i>                                        | 4.37 | 1.37, 15.2 | 0.015   |
| <sup>1</sup> OR = Odds Ratio, CI = Confidence Interval |      |            |         |

**Table S3.** Main results Risk ratio for the occurrence of initial recanalization. Risk Ratio RR, Confidence Interval CI.

| Characteristic  | RR   | 95% CI     | p-value |
|-----------------|------|------------|---------|
| Grouping        |      |            |         |
| <i>Group I</i>  | —    | —          |         |
| <i>Group II</i> | 1.75 | 1.05, 3.00 | 0.041   |

**Table S4.** Main results Risk ratio for the occurrence of functional recanalization. Risk Ratio RR, Confidence Interval CI.

| Characteristic  | RR   | 95% CI     | p-value |
|-----------------|------|------------|---------|
| Grouping        |      |            |         |
| <i>Group I</i>  | —    | —          |         |
| <i>Group II</i> | 1.96 | 1.15, 3.51 | 0.021   |

**Table S5.** Summary of study results in detail. Left/Right internal carotid artery LCI/RCI; left/right vertebral artery LVA/RVA; Certoparin Cert, Dabigatran Dabi, Acetylsalicylic Acid ASA, Prasugrel Pra, Clopidogrel Clo, Warfarin War; occluded/residual stenosis o/s.

| #, Sex, age | Site of dissection | Stroke initially | Drug combination      | Days to initial recanalization | Days to functional recanalization | NSAE/M AE |
|-------------|--------------------|------------------|-----------------------|--------------------------------|-----------------------------------|-----------|
| #1, M, 51   | LCI                | y                | Cert/Dabi+ASA/<br>Pra | 16                             | 141                               |           |
| #2, M, 54   | LCI                | n                | Cert/Dabi+ASA/<br>Pra | 51                             | 51                                |           |
| #3, F, 55   | LCI                | n                | Cert/Dabi+ASA/<br>Pra | 6                              | 56                                |           |
| #4, M, 54   | RCI                | y                | Cert/Dabi+ASA/<br>Pra | 66                             | 66                                |           |
| #5, M, 54   | LCI                | y                | Cert/Dabi+ASA/<br>Pra | 7                              | 7                                 |           |
| #6, F, 47   | RCI                | n                | Cert/Dabi+ASA/<br>Pra | 6                              | 65                                |           |
| #7, F, 33   | RCI                | y                | Cert/Dabi+ASA/<br>Pra | o/s                            | o/s                               |           |
| #8, M, 68   | RVA                | y                | Cert/Dabi+ASA/<br>Pra | 4                              | 24                                |           |
| #9, F, 22   | RVA                | y                | Cert/Dabi+ASA/<br>Pra | o/s                            | o/s                               |           |
| #10, M, 45  | RVA                | y                | Cert/Dabi+ASA/<br>Clo | o/s                            | o/s                               |           |
| #11, M, 50  | RCI                | n                | Cert/Dabi+ASA/<br>Clo | 25                             | 25                                |           |
| #12, F, 48  | LCI                | n                | Cert/Dabi+ASA/<br>Pra | o/s                            | o/s                               | NSAE      |
| #13, M, 52  | LCI                | y                | Cert/Dabi+ASA/<br>Pra | 45                             | 45                                |           |
| #14, F, 36  | LCI                | y                | Cert/Dabi+ASA/<br>Clo | 53                             | 151                               |           |
| #15, M, 43  | LCI                | y                | Cert/Dabi+ASA         | 77                             | 77                                |           |
| #16, M, 52  | RVA                | n                | Cert/Dabi+ASA         | o/s                            | o/s                               |           |
| #17, F, 31  | RCI                | n                | Cert/Dabi+ASA         | 109                            | 109                               |           |
| #18, M, 47  | RCI                | n                | Cert/Dabi+ASA         | 10                             | 10                                |           |
| #19, F, 49  | LCI                | n                | Cert/Dabi+ASA         | 51                             | 51                                |           |
| #20, M, 57  | RCI                | y                | Cert/Dabi+ASA         | o/s                            | o/s                               |           |
| #21, M, 39  | LCI                | y                | Cert/Dabi+ASA         | 99                             | 99                                |           |
| #22, M, 50  | LVA                | y                | Cert/Dabi+ASA         | o/s                            | o/s                               |           |
| #23, F, 48  | RCI                | n                | Cert/Dabi+ASA         | 64                             | 64                                |           |
| #24, M, 35  | RCI                | y                | Cert/Dabi+ASA         | o/s                            | o/s                               |           |

|               |          |   |               |     |     |      |
|---------------|----------|---|---------------|-----|-----|------|
| #25, F,<br>39 | LCI, RCI | n | Cert/Dabi+ASA | 10  | 34  |      |
| #26, F,<br>47 | LCI      | y | Cert/Dabi+ASA | 4   | 187 |      |
| #27,<br>M, 23 | LVA      | y | Cert/Dabi+ASA | 52  | 52  |      |
| #28, F,<br>47 | LCI      | y | Cert/Dabi+ASA | 4   | 187 |      |
| #29,<br>M, 54 | LCI      | n | ASA           | o/s | o/s |      |
| #30, F,<br>16 | RCI      | n | ASA           | o/s | o/s |      |
| #31, F,<br>67 | RCI      | y | ASA/Pra       | o/s | o/s |      |
| #32,<br>M, 43 | RCI      | n | ASA/Pra       | 19  | 19  |      |
| #33,<br>M, 37 | RCI      | n | ASA/Pra       | 29  | 29  |      |
| #34, F,<br>41 | RCI      | y | ASA/Clo       | o/s | o/s |      |
| #35,<br>M, 50 | LCI, RCI | y | ASA/Pra       | o/s | o/s |      |
| #36,<br>M, 59 | LVA      | n | ASA           | o/s | o/s |      |
| #37,<br>M, 42 | RCI      | n | ASA           | o/s | o/s |      |
| #38, F,<br>40 | LCI      | n | ASA           | o/s | o/s |      |
| #39, F,<br>40 | RCI      | y | ASA/Pra       | o/s | o/s | NSAE |
| #40,<br>M, 31 | RVA      | n | ASA           | 94  | 94  |      |
| #41,<br>M, 62 | LCI      | y | Cert/War      | 119 | o/s |      |
| #42, F,<br>42 | LVA, RVA | y | Cert/War      | o/s | o/s |      |
| #43,<br>M, 50 | LCI      | y | Cert/War      | o/s | o/s |      |
| #44, F,<br>43 | LCI      | n | ASA           | 91  | 91  |      |
| #45, F,<br>45 | RCI      | n | ASA           | 168 | 168 |      |
| #46,<br>M, 61 | RVA      | n | ASA/Clo       | o/s | o/s |      |
| #47, F,<br>36 | LCI      | y | ASA/Clo       | 53  | 151 | MAE  |
| #48, F,<br>30 | RCI, RVA | n | ASA/Pra       | 88  | 88  | NSAE |
| #49,<br>M, 56 | LCI      | y | Cert/War      | 3   | 3   |      |
| #50,<br>M, 33 | LVA      | n | ASA           | o/s | o/s |      |
